# Supplementary material for: Current practices for respiratory syncytial virus surveillance across the EU/EEA Member States, 2017
Source: PubMed Central journal article supplement (PMC6784450; doi:10.2807/1560-7917.es.2019.24.40.1900157), 2019-10-03
Supplement: 19-00157_TEIRLINCK_supplement2.pdf [file 19-00157_TEIRLINCK_supplement2.pdf]

## Supplementary file 2: Country specific RSV surveillance in EU/EEA Member States

This supplementary material is hosted by *Eurosurveillance* as supporting information alongside the article **Current practices for Respiratory Syncytial Virus surveillance across the EU/EEA Member States, 2017**, on behalf of the authors, who remain responsible for the accuracy and appropriateness of the content. The same standards for ethics, copyright, attributions and permissions as for the article apply. Supplements are not edited by Eurosurveillance and the journal is not responsible for the maintenance of any links or email addresses provided therein.

### Austria

|                            | Sentinel                                                                                                                                                                                                                                        |                                                                                                                                                                                                                                        | Non-sentinel                   |
|----------------------------|-------------------------------------------------------------------------------------------------------------------------------------------------------------------------------------------------------------------------------------------------|----------------------------------------------------------------------------------------------------------------------------------------------------------------------------------------------------------------------------------------|--------------------------------|
| Type of health facilities  | GPs and Paediatricians                                                                                                                                                                                                                          | Hospitals (PICU and paediatric departments)                                                                                                                                                                                            | Labs (notifications)           |
| Set up                     | Part of influenza surveillance                                                                                                                                                                                                                  | Part of influenza surveillance                                                                                                                                                                                                         | Part of influenza surveillance |
| Period                     | Week 40-20                                                                                                                                                                                                                                      | Week 40-20                                                                                                                                                                                                                             | Week 40-20                     |
| Frequency                  | Weekly                                                                                                                                                                                                                                          | Weekly                                                                                                                                                                                                                                 | Weekly                         |
| Aggregation level          | Case-based                                                                                                                                                                                                                                      | Case-based                                                                                                                                                                                                                             | Aggregated                     |
| Population covered         | 0-1%                                                                                                                                                                                                                                            | 0-1%                                                                                                                                                                                                                                   | x                              |
| Year introduced            | 2000                                                                                                                                                                                                                                            | 2000                                                                                                                                                                                                                                   | 2012                           |
| Eligible for sampling      | ILI/ARI                                                                                                                                                                                                                                         | SARI                                                                                                                                                                                                                                   | No                             |
| Sampling algorithm for RSV | No                                                                                                                                                                                                                                              | No                                                                                                                                                                                                                                     | No                             |
| Information available      | Unique patient identifier;Age or date of birth;Sex;Geographical information;Date of clinical onset;Date of sampling;Date of diagnosis;Clinical symptoms;Immunosuppressive medication or condition;Chronic lung disease;Other pathogens detected | Unique patient identifier;Age or date of birth;Sex;Geographical information;Date of clinical onset;Date of sampling;Date of diagnosis;Clinical symptoms;Immunosuppressive medication or condition;Chronic lung disease;Hospitalization | Reporting of aggregated data   |
| Denominator known          |                                                                                                                                                                                                                                                 |                                                                                                                                                                                                                                        | No                             |

## Belgium

|                            | Sentinel                                                                                                                                                                                                                                                                                                     |                                                                                                                                                                                                                                                                                                              |                                                                        | Non-sentinel                                                           |
|----------------------------|--------------------------------------------------------------------------------------------------------------------------------------------------------------------------------------------------------------------------------------------------------------------------------------------------------------|--------------------------------------------------------------------------------------------------------------------------------------------------------------------------------------------------------------------------------------------------------------------------------------------------------------|------------------------------------------------------------------------|------------------------------------------------------------------------|
| Type of health facilities  | GPs                                                                                                                                                                                                                                                                                                          | Hospital                                                                                                                                                                                                                                                                                                     | Labs                                                                   | Hospitals sent samples to national reference lab for typing            |
| Set up                     | Part of influenza surveillance                                                                                                                                                                                                                                                                               | Part of influenza surveillance                                                                                                                                                                                                                                                                               | Part of other surveillance                                             | Part of other surveillance                                             |
| Period                     | Week 40 to 20                                                                                                                                                                                                                                                                                                | Week 40 to 20                                                                                                                                                                                                                                                                                                | All year round                                                         | All year round                                                         |
| Frequency                  | Weekly                                                                                                                                                                                                                                                                                                       | Weekly                                                                                                                                                                                                                                                                                                       | Weekly                                                                 |                                                                        |
| Aggregation level          | Case-based                                                                                                                                                                                                                                                                                                   | Case-based                                                                                                                                                                                                                                                                                                   | Case-based                                                             | Case-based                                                             |
| Population covered         |                                                                                                                                                                                                                                                                                                              |                                                                                                                                                                                                                                                                                                              | ~60 of all microbiological labs                                        |                                                                        |
| Year introduced            | Season 2015-2016                                                                                                                                                                                                                                                                                             | Season 2015-2016                                                                                                                                                                                                                                                                                             | 1996                                                                   | 2013                                                                   |
| Eligible for sampling      | ILI                                                                                                                                                                                                                                                                                                          | SARI                                                                                                                                                                                                                                                                                                         | Yes                                                                    | Yes                                                                    |
| Sampling algorithm for RSV |                                                                                                                                                                                                                                                                                                              |                                                                                                                                                                                                                                                                                                              |                                                                        |                                                                        |
| Information available      | Unique patient identifier; Age or date of birth; Sex; Geographical information; Date of clinical onset; Date of sampling; Date of diagnosis; Date of notification to surveillance organisation; Clinical symptoms; Immunosuppressive medication or condition; Chronic lung disease; Other pathogens detected | Unique patient identifier; Age or date of birth; Sex; Geographical information; Date of clinical onset; Date of sampling; Date of diagnosis; Date of notification to surveillance organisation; Clinical symptoms; Immunosuppressive medication or condition; Chronic lung disease; Other pathogens detected | Age or date of birth; Sex; Geographical information; Date of diagnosis | Age or date of birth; Sex; Geographical information; Date of diagnosis |
| Denominator known          |                                                                                                                                                                                                                                                                                                              |                                                                                                                                                                                                                                                                                                              |                                                                        | No, only number of tests done by NRL, not all labs                     |

## Bulgaria

|                                   | <b>Sentinel</b>                | <b>Non-sentinel</b>            |
|-----------------------------------|--------------------------------|--------------------------------|
| <b>Type of health facilities</b>  | GPs                            | Hospitals and GPs              |
| <b>Set up</b>                     | Part of influenza surveillance | Part of influenza surveillance |
| <b>Period</b>                     | Week 40 to 20                  | All year round                 |
| <b>Frequency</b>                  | Weekly                         | Weekly                         |
| <b>Aggregation level</b>          | aggregated                     | aggregated                     |
| <b>Population covered</b>         | 5,3%                           |                                |
| <b>Year introduced</b>            | 2001                           | 1958                           |
| <b>Eligible for sampling</b>      | ARI                            | ILI, SARI                      |
| <b>Sampling algorithm for RSV</b> | Yes                            | No                             |
| <b>Information available</b>      | Yes                            | yes                            |
| <b>Denominator known</b>          |                                | no                             |

## Croatia

|                            | Sentinel | Non-sentinel                                                                 |
|----------------------------|----------|------------------------------------------------------------------------------|
| Type of health facilities  | None     | Labs (All respiratory specimens sent to National Virus Reference Laboratory) |
| Set up                     |          | Through RSV-related studies                                                  |
| Period                     |          | All year                                                                     |
| Frequency                  |          | weekly                                                                       |
| Aggregation level          |          | Case-based                                                                   |
| Population covered         |          | 20%                                                                          |
| Year introduced            |          | 1980                                                                         |
| Eligible for sampling      |          | No                                                                           |
| Sampling algorithm for RSV |          | No                                                                           |
| Information available      |          | Age or date of birth;Sex;Geographical information;Hospitalization            |
| Denominator known          |          | No                                                                           |

## Cyprus

|                            | Sentinel | Non-sentinel                                                                                                                         |
|----------------------------|----------|--------------------------------------------------------------------------------------------------------------------------------------|
| Type of health facilities  | None     | Hospitals (PICU/paediatric departments)<br>unofficial system that captures most severe cases                                         |
| Set up                     |          | Part of influenza surveillance                                                                                                       |
| Period                     |          | Week 40-20                                                                                                                           |
| Frequency                  |          | Weekly                                                                                                                               |
| Aggregation level          |          | Case-based                                                                                                                           |
| Population covered         |          | Population < 15 yrs                                                                                                                  |
| Year introduced            |          | 2015                                                                                                                                 |
| Eligible for sampling      |          | No. Left to clinical definition of paediatrician                                                                                     |
| Sampling algorithm for RSV |          | No                                                                                                                                   |
| Information available      |          | Unique patient identifier; Age or date of birth; Sex; Geographical information; Date of sampling; Clinical symptoms; Hospitalization |
| Denominator known          |          | Yes                                                                                                                                  |

## Czech Republic

|                            | Sentinel                                                                                                                                      | Non-sentinel                          |
|----------------------------|-----------------------------------------------------------------------------------------------------------------------------------------------|---------------------------------------|
| Type of health facilities  | GP                                                                                                                                            | Lab                                   |
| Set up                     | Part of influenza surveillance                                                                                                                | Part of influenza surveillance        |
| Period                     | Week 40-20                                                                                                                                    | Week 40-20 or all year around         |
| Frequency                  | Weekly                                                                                                                                        | Weekly                                |
| Aggregation level          | Aggregated                                                                                                                                    | Aggregated                            |
| Population covered         |                                                                                                                                               |                                       |
| Year introduced            | From season 2013/2014 - introduction of PCR for sentinel samples, until then virus isolation and serology were used                           |                                       |
| Eligible for sampling      | ILI/ARI                                                                                                                                       | ILI and ARI                           |
| Sampling algorithm for RSV | The same sampling strategy as for flu                                                                                                         | The same sampling strategy as for flu |
| Information available      | Unique patient identifier; Age or date of birth; Sex; Geographical information; Date of clinical onset; Date of sampling, Symptoms, Diagnosis |                                       |
| Denominator known          |                                                                                                                                               | -                                     |

## Denmark

|                            | Sentinel                                                                                                                                                                            | Non-sentinel                                                                                                                                                                                                                                                                                          |
|----------------------------|-------------------------------------------------------------------------------------------------------------------------------------------------------------------------------------|-------------------------------------------------------------------------------------------------------------------------------------------------------------------------------------------------------------------------------------------------------------------------------------------------------|
| Type of health facilities  | GPs                                                                                                                                                                                 | Labs                                                                                                                                                                                                                                                                                                  |
| Set up                     | Part of influenza surveillance                                                                                                                                                      | Notifications through national register                                                                                                                                                                                                                                                               |
| Period                     | Week 40-20                                                                                                                                                                          | All year round                                                                                                                                                                                                                                                                                        |
| Frequency                  | Weekly                                                                                                                                                                              | Weekly                                                                                                                                                                                                                                                                                                |
| Aggregation level          | Aggregated                                                                                                                                                                          | Aggregated                                                                                                                                                                                                                                                                                            |
| Population covered         | 1-5%                                                                                                                                                                                | x                                                                                                                                                                                                                                                                                                     |
| Year introduced            | 2009                                                                                                                                                                                | 2015                                                                                                                                                                                                                                                                                                  |
| Eligible for sampling      | ILI                                                                                                                                                                                 | No                                                                                                                                                                                                                                                                                                    |
| Sampling algorithm for RSV | No                                                                                                                                                                                  | No                                                                                                                                                                                                                                                                                                    |
| Information available      | Unique patient identifier; Age or date of birth; Sex; Geographical information; Date of clinical onset; Date of sampling; Other: other data can be found in the national registries | Unique patient identifier; Age or date of birth; Sex; Geographical information; Date of clinical onset; Date of sampling; Date of diagnosis; Date of notification to surveillance organisation; Source of notification; Hospitalization; Premature birth; RSV related death; Other pathogens detected |
| Denominator known          |                                                                                                                                                                                     | Yes                                                                                                                                                                                                                                                                                                   |

## Estonia

|                            | Sentinel                       | Non-sentinel       |
|----------------------------|--------------------------------|--------------------|
| Type of health facilities  | GPs/Polyclinic/family doctor   | Labs               |
| Set up                     | Part of influenza surveillance | Other surveillance |
| Period                     | All year round                 | All year round     |
| Frequency                  | Weekly                         | Weekly             |
| Aggregation level          | Aggregated by age group        | Aggregated         |
| Population covered         | 14%                            | x                  |
| Year introduced            | 2006                           | 1965               |
| Eligible for sampling      | ILI                            | No                 |
| Sampling algorithm for RSV | No                             | x                  |
| Information available      |                                |                    |
| Denominator known          |                                | Yes                |



## Finland

|                            | Sentinel                                                                                                                                                                                                                             |
|----------------------------|--------------------------------------------------------------------------------------------------------------------------------------------------------------------------------------------------------------------------------------|
| Type of health facilities  | GPs                                                                                                                                                                                                                                  |
| Set up                     | Part of influenza surveillance                                                                                                                                                                                                       |
| Period                     | All year round                                                                                                                                                                                                                       |
| Frequency                  | Weekly                                                                                                                                                                                                                               |
| Aggregation level          | Aggregated                                                                                                                                                                                                                           |
| Population covered         |                                                                                                                                                                                                                                      |
| Year introduced            | 2005                                                                                                                                                                                                                                 |
| Eligible for sampling      | No                                                                                                                                                                                                                                   |
| Sampling algorithm for RSV | No                                                                                                                                                                                                                                   |
| Information available      | Unique patient identifier; Age or date of birth; Sex; Geographical information; Date of clinical onset; Date of sampling; Immunosuppressive medication or condition; Chronic lung disease; Hospitalization; Other pathogens detected |
| Denominator known          |                                                                                                                                                                                                                                      |

| Non-sentinel                                                                                                                                                                                                                         |                                                                                                                                                                             |
|--------------------------------------------------------------------------------------------------------------------------------------------------------------------------------------------------------------------------------------|-----------------------------------------------------------------------------------------------------------------------------------------------------------------------------|
| Hospitals (ICUs)                                                                                                                                                                                                                     | Labs                                                                                                                                                                        |
| Part of influenza surveillance                                                                                                                                                                                                       | Part of other surveillance                                                                                                                                                  |
| All year round                                                                                                                                                                                                                       | All year round                                                                                                                                                              |
| Weekly                                                                                                                                                                                                                               |                                                                                                                                                                             |
| Aggregated                                                                                                                                                                                                                           |                                                                                                                                                                             |
|                                                                                                                                                                                                                                      |                                                                                                                                                                             |
| 2013                                                                                                                                                                                                                                 | 1995                                                                                                                                                                        |
| No                                                                                                                                                                                                                                   | No                                                                                                                                                                          |
|                                                                                                                                                                                                                                      |                                                                                                                                                                             |
| Unique patient identifier; Age or date of birth; Sex; Geographical information; Date of clinical onset; Date of sampling; Immunosuppressive medication or condition; Chronic lung disease; Hospitalization; Other pathogens detected | Unique patient identifier; Age or date of birth; Sex; Geographical information; Date of sampling; Date of notification to surveillance organisation; Source of notification |
| No                                                                                                                                                                                                                                   | No                                                                                                                                                                          |

## France

|                            | Sentinel                           |                                       | Non-sentinel                                                                     |
|----------------------------|------------------------------------|---------------------------------------|----------------------------------------------------------------------------------|
| Type of health facilities  | Hospital labs (Renal)              | GPs                                   | Emergency medical visits (home (SOS Médecins) and in hospital (OSCOUR©))         |
| Set up                     | Part of other surveillance         | Part of other surveillance            | Syndromic surveillance                                                           |
| Period                     | Week 40 to 20                      | Week 40 to 20                         | Week 40 to 20                                                                    |
| Frequency                  | Weekly                             | Weekly                                | Weekly                                                                           |
| Aggregation level          | Aggregated                         | Aggregated                            | Aggregated                                                                       |
| Population covered         | All ages                           | All ages                              | Infants ≤ 2 years                                                                |
| Year introduced            |                                    |                                       | 2009                                                                             |
| Eligible for sampling      | ARI                                | ILI                                   | Bronchiolitis in emergency visits and hospitalization for clinical bronchiolitis |
| Sampling algorithm for RSV |                                    | The same sampling strategy as for flu | x                                                                                |
| Information available      | Number of samples positive for RSV |                                       | Age;Sex;Geographical information : region;Hospitalization                        |
| Denominator known          |                                    |                                       | No                                                                               |

## Germany

|                            | Sentinel                                                                                                                                                                                             | Non-sentinel                |
|----------------------------|------------------------------------------------------------------------------------------------------------------------------------------------------------------------------------------------------|-----------------------------|
| Type of health facilities  | GPs                                                                                                                                                                                                  | Other                       |
| Set up                     | Part of influenza surveillance                                                                                                                                                                       | Through RSV-related studies |
| Period                     | All year                                                                                                                                                                                             |                             |
| Frequency                  | Weekly                                                                                                                                                                                               |                             |
| Aggregation level          | Case-based                                                                                                                                                                                           |                             |
| Population covered         | 0-1%                                                                                                                                                                                                 |                             |
| Year introduced            | 2010                                                                                                                                                                                                 |                             |
| Eligible for sampling      | ILI/ARI                                                                                                                                                                                              |                             |
| Sampling algorithm for RSV | No                                                                                                                                                                                                   |                             |
| Information available      | Age or date of birth; Sex; Geographical information; Date of clinical onset; Date of sampling; Date of diagnosis; Clinical symptoms; Immunosuppressive medication or condition; Chronic lung disease |                             |
| Denominator known          |                                                                                                                                                                                                      | No                          |

## Greece

|                            | Sentinel | Non-sentinel                                                                                                                              |
|----------------------------|----------|-------------------------------------------------------------------------------------------------------------------------------------------|
| Type of health facilities  | None     | Labs                                                                                                                                      |
| Set up                     |          | Part of other surveillance                                                                                                                |
| Period                     |          | All year round                                                                                                                            |
| Frequency                  |          |                                                                                                                                           |
| Aggregation level          |          |                                                                                                                                           |
| Population covered         |          |                                                                                                                                           |
| Year introduced            |          |                                                                                                                                           |
| Eligible for sampling      |          |                                                                                                                                           |
| Sampling algorithm for RSV |          |                                                                                                                                           |
| Information available      |          | Unique patient identifier;<br>Age or date of birth; Sex;<br>Date of sampling; Date of<br>diagnosis; Hospitalization<br>time; RSV genotype |
| Denominator known          |          | Yes: The total number of<br>samples tested for RSV                                                                                        |

## Hungary

|                                   | <b>Sentinel</b>                |
|-----------------------------------|--------------------------------|
| <b>Type of health facilities</b>  | GPs, Paediatric practice       |
| <b>Set up</b>                     | Part of influenza surveillance |
| <b>Period</b>                     | week 40 to 20                  |
| <b>Frequency</b>                  | weekly                         |
| <b>Aggregation level</b>          | Case-based                     |
| <b>Population covered</b>         | >20%                           |
| <b>Year introduced</b>            | 2005                           |
| <b>Eligible for sampling</b>      | Yes                            |
| <b>Sampling algorithm for RSV</b> | ILI                            |
| <b>Information available</b>      | Yes                            |
| <b>Denominator known</b>          |                                |

| <b>Non-sentinel</b>                                |
|----------------------------------------------------|
| Hospitals                                          |
| Part of influenza surveillance between 40-20 weeks |
| All year round                                     |
| Weekly                                             |
| Case-based                                         |
|                                                    |
| 2005                                               |
| Yes                                                |
| SARI                                               |
| Yes                                                |
| No                                                 |

## Iceland

|                            | Sentinel | Non-sentinel                                                                                                                                                          |                                                                                                                                             |
|----------------------------|----------|-----------------------------------------------------------------------------------------------------------------------------------------------------------------------|---------------------------------------------------------------------------------------------------------------------------------------------|
| Type of health facilities  | None     | GPs/hospitals                                                                                                                                                         | Labs                                                                                                                                        |
| Set up                     |          | Part of other surveillance                                                                                                                                            | Part of other surveillance                                                                                                                  |
| Period                     |          | All year round                                                                                                                                                        | All year round                                                                                                                              |
| Frequency                  |          | weekly                                                                                                                                                                | weekly                                                                                                                                      |
| Aggregation level          |          | case-based                                                                                                                                                            | case-based                                                                                                                                  |
| Population covered         |          |                                                                                                                                                                       |                                                                                                                                             |
| Year introduced            |          | 2011                                                                                                                                                                  | 2011                                                                                                                                        |
| Eligible for sampling      |          | ICD-10                                                                                                                                                                | Testing based on clinical judgement                                                                                                         |
| Sampling algorithm for RSV |          | No                                                                                                                                                                    | No                                                                                                                                          |
| Information available      |          | Unique patient identifier;Age or date of birth;Sex;Geographical information;Date of sampling;Date of notification to surveillance organisation;Source of notification | Age or date of birth;Sex;Geographical information;Date of sampling;Date of notification to surveillance organisation;Source of notification |
| Denominator known          |          | No                                                                                                                                                                    | Yes                                                                                                                                         |

## Ireland

|                            | Sentinel                                                                                                                                                                                                                                                                                                                                                                                                                                                                           | Non-sentinel                                                                                                                                                                                   |                                                                                                                                                                                                                |
|----------------------------|------------------------------------------------------------------------------------------------------------------------------------------------------------------------------------------------------------------------------------------------------------------------------------------------------------------------------------------------------------------------------------------------------------------------------------------------------------------------------------|------------------------------------------------------------------------------------------------------------------------------------------------------------------------------------------------|----------------------------------------------------------------------------------------------------------------------------------------------------------------------------------------------------------------|
| Type of health facilities  | GPs                                                                                                                                                                                                                                                                                                                                                                                                                                                                                | Labs (All respiratory specimens sent to National Virus Reference Laboratory)                                                                                                                   | Notification system (all RSV detections, including outbreaks)                                                                                                                                                  |
| Set up                     | Part of influenza surveillance                                                                                                                                                                                                                                                                                                                                                                                                                                                     | Part of influenza surveillance                                                                                                                                                                 | Specifically for RSV                                                                                                                                                                                           |
| Period                     | All year                                                                                                                                                                                                                                                                                                                                                                                                                                                                           | All year                                                                                                                                                                                       | All year                                                                                                                                                                                                       |
| Frequency                  | Weekly                                                                                                                                                                                                                                                                                                                                                                                                                                                                             | Weekly                                                                                                                                                                                         | Weekly                                                                                                                                                                                                         |
| Aggregation level          | Case-based                                                                                                                                                                                                                                                                                                                                                                                                                                                                         | Case-based                                                                                                                                                                                     | Case-based                                                                                                                                                                                                     |
| Population covered         | 6%                                                                                                                                                                                                                                                                                                                                                                                                                                                                                 | x                                                                                                                                                                                              | x                                                                                                                                                                                                              |
| Year introduced            | 2000                                                                                                                                                                                                                                                                                                                                                                                                                                                                               | 2000                                                                                                                                                                                           | 2012                                                                                                                                                                                                           |
| Eligible for sampling      | ILI                                                                                                                                                                                                                                                                                                                                                                                                                                                                                | No                                                                                                                                                                                             | Yes                                                                                                                                                                                                            |
| Sampling algorithm for RSV | No                                                                                                                                                                                                                                                                                                                                                                                                                                                                                 | No                                                                                                                                                                                             | No                                                                                                                                                                                                             |
| Information available      | Unique patient identifier;Age or date of birth;Sex;Geographical information;Date of clinical onset;Date of sampling;Date of notification to surveillance organisation;Source of notification;Other pathogens detected;Other: influenza vaccination status, date of influenza vaccination, exposure to antivirals, is the patient in a risk group for flu. All sentinel specimens are tested for influenza, RSV, parainfluenza viruses 1-4, human metapneumovirus and adeno viruses | Unique patient identifier;Age or date of birth;Sex;Geographical information;Date of sampling;Date of notification to surveillance organisation;Source of notification;Other pathogens detected | Unique patient identifier;Age or date of birth;Sex;Geographical information;Date of clinical onset;Date of sampling;Date of diagnosis;Date of notification to surveillance organisation;Source of notification |
| Denominator known          |                                                                                                                                                                                                                                                                                                                                                                                                                                                                                    | Yes                                                                                                                                                                                            | Irish population                                                                                                                                                                                               |

## Italy

|                                   | <b>Sentinel</b> | <b>Non-sentinel</b> |
|-----------------------------------|-----------------|---------------------|
| <b>Type of health facilities</b>  | None            | None                |
| <b>Set up</b>                     |                 |                     |
| <b>Period</b>                     |                 |                     |
| <b>Frequency</b>                  |                 |                     |
| <b>Aggregation level</b>          |                 |                     |
| <b>Population covered</b>         |                 |                     |
| <b>Year introduced</b>            |                 |                     |
| <b>Eligible for sampling</b>      |                 |                     |
| <b>Sampling algorithm for RSV</b> |                 |                     |
| <b>Information available</b>      |                 |                     |
| <b>Denominator known</b>          |                 |                     |



## Latvia

|                            | Sentinel                                                                                                                                                                                                                                                            | Non-sentinel                                                                                   |
|----------------------------|---------------------------------------------------------------------------------------------------------------------------------------------------------------------------------------------------------------------------------------------------------------------|------------------------------------------------------------------------------------------------|
| Type of health facilities  | GPs/family doctor                                                                                                                                                                                                                                                   | Hospitals                                                                                      |
| Set up                     | Part of influenza surveillance                                                                                                                                                                                                                                      | Part of other surveillance                                                                     |
| Period                     | Week 40-20                                                                                                                                                                                                                                                          | All year round                                                                                 |
| Frequency                  | Weekly                                                                                                                                                                                                                                                              | Weekly                                                                                         |
| Aggregation level          | Case-based                                                                                                                                                                                                                                                          | Aggregated                                                                                     |
| Population covered         | 0-1%                                                                                                                                                                                                                                                                | x                                                                                              |
| Year introduced            | 2011                                                                                                                                                                                                                                                                | 1993                                                                                           |
| Eligible for sampling      | ILI                                                                                                                                                                                                                                                                 | Testing based on clinical judgement                                                            |
| Sampling algorithm for RSV | No                                                                                                                                                                                                                                                                  | No                                                                                             |
| Information available      | Unique patient identifier; Age or date of birth; Sex; Date of clinical onset; Clinical symptoms; Diagnosis; Date of sampling; Source of notification; Other pathogens detected; Influenza vaccination status; Date of influenza vaccination; Exposure to antivirals | Unique patient identifier; Age or date of birth; Sex; Date of clinical onset; Date of sampling |
| Denominator known          |                                                                                                                                                                                                                                                                     | No                                                                                             |

## Lithuania

|                                   | <b>Sentinel</b> | <b>Non-sentinel</b> |
|-----------------------------------|-----------------|---------------------|
| <b>Type of health facilities</b>  | None            | None                |
| <b>Set up</b>                     |                 |                     |
| <b>Period</b>                     |                 |                     |
| <b>Frequency</b>                  |                 |                     |
| <b>Aggregation level</b>          |                 |                     |
| <b>Population covered</b>         |                 |                     |
| <b>Year introduced</b>            |                 |                     |
| <b>Eligible for sampling</b>      |                 |                     |
| <b>Sampling algorithm for RSV</b> |                 |                     |
| <b>Information available</b>      |                 |                     |
| <b>Denominator known</b>          |                 |                     |

## Luxembourg

|                                   | <b>Sentinel</b> | <b>Non-sentinel</b> |
|-----------------------------------|-----------------|---------------------|
| <b>Type of health facilities</b>  | None            | None                |
| <b>Set up</b>                     |                 |                     |
| <b>Period</b>                     |                 |                     |
| <b>Frequency</b>                  |                 |                     |
| <b>Aggregation level</b>          |                 |                     |
| <b>Population covered</b>         |                 |                     |
| <b>Year introduced</b>            |                 |                     |
| <b>Eligible for sampling</b>      |                 |                     |
| <b>Sampling algorithm for RSV</b> |                 |                     |
| <b>Information available</b>      |                 |                     |
| <b>Denominator known</b>          |                 |                     |

## Malta

|                            | Sentinel | Non-sentinel                                                     |
|----------------------------|----------|------------------------------------------------------------------|
| Type of health facilities  | None     | Hospital labs                                                    |
| Set up                     |          | Part of influenza surveillance                                   |
| Period                     |          | All year round                                                   |
| Frequency                  |          | Weekly                                                           |
| Aggregation level          |          | Case-based                                                       |
| Population covered         |          |                                                                  |
| Year introduced            |          | 2013                                                             |
| Eligible for sampling      |          | ILI                                                              |
| Sampling algorithm for RSV |          |                                                                  |
| Information available      |          | Unique patient identifier;Sex;Date of sampling;Date of diagnosis |
| Denominator known          |          |                                                                  |

## The Netherlands

|                            | Sentinel                                                                                                                                                                                                                                                                                                                             |
|----------------------------|--------------------------------------------------------------------------------------------------------------------------------------------------------------------------------------------------------------------------------------------------------------------------------------------------------------------------------------|
| Type of health facilities  | GPs                                                                                                                                                                                                                                                                                                                                  |
| Set up                     | Part of influenza surveillance                                                                                                                                                                                                                                                                                                       |
| Period                     | All year round                                                                                                                                                                                                                                                                                                                       |
| Frequency                  | Weekly                                                                                                                                                                                                                                                                                                                               |
| Aggregation level          | Case-based                                                                                                                                                                                                                                                                                                                           |
| Population covered         | 0-1%                                                                                                                                                                                                                                                                                                                                 |
| Year introduced            | 1992                                                                                                                                                                                                                                                                                                                                 |
| Eligible for sampling      | ILI and ARI                                                                                                                                                                                                                                                                                                                          |
| Sampling algorithm for RSV | No                                                                                                                                                                                                                                                                                                                                   |
| Information available      | Unique patient identifier; Age or date of birth; Sex; Geographical information; Date of clinical onset; Date of sampling; Date of diagnosis; Date of notification to surveillance organisation; Source of notification; Clinical symptoms; Immunosuppressive medication or condition; Chronic lung disease; Other pathogens detected |
| Denominator known          |                                                                                                                                                                                                                                                                                                                                      |

| Non-sentinel                                                                                             |                                                                                                                    |
|----------------------------------------------------------------------------------------------------------|--------------------------------------------------------------------------------------------------------------------|
| Labs                                                                                                     | Hospitals                                                                                                          |
| Notifications                                                                                            | Network of PICUs including lab report*                                                                             |
| All year round                                                                                           | Week 40 to 20                                                                                                      |
| Weekly                                                                                                   | Weekly                                                                                                             |
| Aggregated                                                                                               | Aggregated                                                                                                         |
| ~80%                                                                                                     | x                                                                                                                  |
| 1964                                                                                                     | 2016                                                                                                               |
| No                                                                                                       | No                                                                                                                 |
| x                                                                                                        | x                                                                                                                  |
| Date of diagnosis; Date of notification to surveillance organisation; Source of notification (which lab) | Hospitalization; Other pathogens detected; Other: week of admission to PICU, four age categories for SARI patients |
| No                                                                                                       | No                                                                                                                 |

- Note: this surveillance has only be operational during season 2016-2017

## Norway

|                            | Sentinel | Non-sentinel               |
|----------------------------|----------|----------------------------|
| Type of health facilities  | None     | Labs                       |
| Set up                     |          | part of other surveillance |
| Period                     |          | All year round             |
| Frequency                  |          | Monthly                    |
| Aggregation level          |          | Aggregated                 |
| Population covered         |          |                            |
| Year introduced            |          | 1969                       |
| Eligible for sampling      |          | No                         |
| Sampling algorithm for RSV |          | No                         |
| Information available      |          |                            |
| Denominator known          |          | No                         |

## Poland

|                                   | <b>Sentinel</b>                                                                                 |
|-----------------------------------|-------------------------------------------------------------------------------------------------|
| <b>Type of health facilities</b>  | GPs                                                                                             |
| <b>Set up</b>                     | Part of influenza sentinel surveillance                                                         |
| <b>Period</b>                     | All year round                                                                                  |
| <b>Frequency</b>                  | Weekly                                                                                          |
| <b>Aggregation level</b>          | Case-based                                                                                      |
| <b>Population covered</b>         | 1-5%                                                                                            |
| <b>Year introduced</b>            | 2004                                                                                            |
| <b>Eligible for sampling</b>      | ILI                                                                                             |
| <b>Sampling algorithm for RSV</b> | Do not know                                                                                     |
| <b>Information available</b>      | Age or date of birth;Geographical information;Date of notification to surveillance organisation |
| <b>Denominator known</b>          |                                                                                                 |

| <b>Non-sentinel</b>                                                                             |                                                                            |
|-------------------------------------------------------------------------------------------------|----------------------------------------------------------------------------|
| Hospitals                                                                                       | Labs                                                                       |
| Part of influenza surveillance                                                                  | Part of influenza surveillance                                             |
| All year round                                                                                  | All year round                                                             |
| Weekly                                                                                          | Weekly                                                                     |
| Case-based                                                                                      | Case-based                                                                 |
| x                                                                                               | x                                                                          |
| 2004                                                                                            | 2004                                                                       |
| Do not know                                                                                     | Do not know                                                                |
| x                                                                                               | x                                                                          |
| Age or date of birth;Geographical information;Date of notification to surveillance organisation | Geographical information;Date of notification to surveillance organisation |
| Do not know                                                                                     | Do not know                                                                |

## Portugal

|                                   | <b>Sentinel</b>                |
|-----------------------------------|--------------------------------|
| <b>Type of health facilities</b>  | GPs and emergency units        |
| <b>Set up</b>                     | Part of influenza surveillance |
| <b>Period</b>                     |                                |
| <b>Frequency</b>                  |                                |
| <b>Aggregation level</b>          |                                |
| <b>Population covered</b>         |                                |
| <b>Year introduced</b>            |                                |
| <b>Eligible for sampling</b>      | Influenza negative cases       |
| <b>Sampling algorithm for RSV</b> |                                |
| <b>Information available</b>      |                                |
| <b>Denominator known</b>          |                                |

| <b>Non-sentinel</b>                                                                                                                                                                                                 |
|---------------------------------------------------------------------------------------------------------------------------------------------------------------------------------------------------------------------|
| Hospital labs                                                                                                                                                                                                       |
| Part of influenza surveillance                                                                                                                                                                                      |
| Week 40-20                                                                                                                                                                                                          |
| Weekly                                                                                                                                                                                                              |
| Case-based                                                                                                                                                                                                          |
| x                                                                                                                                                                                                                   |
| 2010                                                                                                                                                                                                                |
| ILI/ARI                                                                                                                                                                                                             |
| No                                                                                                                                                                                                                  |
| Age or date of birth; Sex; Geographical information; Date of sampling; Date of notification to surveillance organisation; Source of notification; Hospitalization; Other pathogens detected; Death                  |
| Yes: The actual denominator is the total number of samples tested for influenza. It will be possible to have a more accurate number of samples tested only for RSV, only for influenza and tested for both viruses. |



## Romania

|                            | Sentinel* | Non-sentinel                                                                                                                                                                         |
|----------------------------|-----------|--------------------------------------------------------------------------------------------------------------------------------------------------------------------------------------|
| Type of health facilities  |           | Hospitals (ICU/paediatric department and infectious disease ward)                                                                                                                    |
| Set up                     |           | Part of influenza surveillance                                                                                                                                                       |
| Period                     |           | Week 40-20                                                                                                                                                                           |
| Frequency                  |           | Weekly                                                                                                                                                                               |
| Aggregation level          |           | Case-based                                                                                                                                                                           |
| Population covered         |           | x                                                                                                                                                                                    |
| Year introduced            |           | 2010                                                                                                                                                                                 |
| Eligible for sampling      |           | SARI, negative for influenza (sporadically)                                                                                                                                          |
| Sampling algorithm for RSV |           | No                                                                                                                                                                                   |
| Information available      |           | Unique patient identifier; Age or date of birth; Sex; Geographical information; Date of clinical onset; Date of sampling; Date of diagnosis; Source of notification; Hospitalization |
| Denominator known          |           | No                                                                                                                                                                                   |

\*sentinel surveillance between 2010/2011 and 2013/2014

## Spain

|                            | Sentinel | Non-sentinel                                                                      |
|----------------------------|----------|-----------------------------------------------------------------------------------|
| Type of health facilities  | None     | Labs                                                                              |
| Set up                     |          | RSV detections. It was set up as a complementary system of Influenza surveillance |
| Period                     |          | Week 40-20                                                                        |
| Frequency                  |          | Weekly                                                                            |
| Aggregation level          |          | Aggregated                                                                        |
| Population covered         |          | Not known                                                                         |
| Year introduced            |          | 2006                                                                              |
| Eligible for sampling      |          | No                                                                                |
| Sampling algorithm for RSV |          | No                                                                                |
| Information available      |          | Weekly RSV detections                                                             |
| Denominator known          |          | Total number of samples tested for viral diagnostic purposes                      |

## Slovakia

-

|                            | Sentinel                       |                                | Non-sentinel |
|----------------------------|--------------------------------|--------------------------------|--------------|
| Type of health facilities  | GPs/paediatric practice        | Hospital (ICU)                 | None         |
| Set up                     | Part of influenza surveillance | Part of influenza surveillance |              |
| Period                     | All year round                 | All year round                 |              |
| Frequency                  | Weekly                         | Weekly                         |              |
| Aggregation level          | Case-based                     | Case-based                     |              |
| Population covered         | not known                      | 100%                           |              |
| Year introduced            | 2002                           | 2006                           |              |
| Eligible for sampling      | No                             | No                             |              |
| Sampling algorithm for RSV | No                             | No                             |              |
| Information available      | Yes                            | Yes                            |              |
| Denominator known          |                                |                                |              |

## Slovenia

|                                   | <b>Sentinel</b>                                                                                                                        |
|-----------------------------------|----------------------------------------------------------------------------------------------------------------------------------------|
| <b>Type of health facilities</b>  | Paediatricians, School doctors and General Practitioners                                                                               |
| <b>Set up</b>                     | Part of influenza surveillance                                                                                                         |
| <b>Period</b>                     | All year round                                                                                                                         |
| <b>Frequency</b>                  | Weekly                                                                                                                                 |
| <b>Aggregation level</b>          | Case-based                                                                                                                             |
| <b>Population covered</b>         | 4%                                                                                                                                     |
| <b>Year introduced</b>            | 1999                                                                                                                                   |
| <b>Eligible for sampling</b>      | ILI                                                                                                                                    |
| <b>Sampling algorithm for RSV</b> | No                                                                                                                                     |
| <b>Information available</b>      | Patient specific data: age, gender, place of residence, onset, date of specimen taken, influenza vaccination status, clinical symptoms |
| <b>Denominator known</b>          |                                                                                                                                        |

| <b>Non-sentinel</b>                                                                                                                             |
|-------------------------------------------------------------------------------------------------------------------------------------------------|
| Labs                                                                                                                                            |
| Specifically for RSV                                                                                                                            |
| All year round                                                                                                                                  |
| Weekly                                                                                                                                          |
| Aggregated                                                                                                                                      |
| 100%                                                                                                                                            |
| 2006                                                                                                                                            |
| ARI                                                                                                                                             |
| No                                                                                                                                              |
| Geographical information;Source of notification; Aggregated data are reported on weekly basis with no exact date of sampling or clinical onset. |
| Yes                                                                                                                                             |

## Sweden

|                            | Sentinel | Non-sentinel                                                                                                                                                                      |                                                                                                                                                           |
|----------------------------|----------|-----------------------------------------------------------------------------------------------------------------------------------------------------------------------------------|-----------------------------------------------------------------------------------------------------------------------------------------------------------|
| Type of health facilities  | None     | Labs and paediatric clinics                                                                                                                                                       | Hospital (ICU excluding NICU)                                                                                                                             |
| Set up                     |          | Part of influenza surveillance                                                                                                                                                    | Other surveillance                                                                                                                                        |
| Period                     |          | Week 40 to 20                                                                                                                                                                     | All year round                                                                                                                                            |
| Frequency                  |          | Weekly                                                                                                                                                                            | Weekly                                                                                                                                                    |
| Aggregation level          |          | Case-based                                                                                                                                                                        | Aggregated                                                                                                                                                |
| Population covered         |          | Total population                                                                                                                                                                  | Total population                                                                                                                                          |
| Year introduced            |          | 1999                                                                                                                                                                              | 2008                                                                                                                                                      |
| Eligible for sampling      |          | No                                                                                                                                                                                | No                                                                                                                                                        |
| Sampling algorithm for RSV |          | x                                                                                                                                                                                 | Unknown                                                                                                                                                   |
| Information available      |          | Age or date of birth;Sex;Geographical information;Date of diagnosis;Date of notification to surveillance organisation;Source of notification;Other: Info from of ICU of RSV cases | Aggregated reports by age group, gender, reporting ICU, geographic region, primary vs other diagnosis of RS pneumonia, type of treatment, and other data. |
| Denominator known          |          | Yes                                                                                                                                                                               | Yes                                                                                                                                                       |

## United Kingdom

|                                   | <b>Sentinel</b>                                                                                                                                                                                                                                                     |
|-----------------------------------|---------------------------------------------------------------------------------------------------------------------------------------------------------------------------------------------------------------------------------------------------------------------|
| <b>Type of health facilities</b>  | GPs                                                                                                                                                                                                                                                                 |
| <b>Set up</b>                     | Part of influenza surveillance                                                                                                                                                                                                                                      |
| <b>Period</b>                     | Week 40 to week 20                                                                                                                                                                                                                                                  |
| <b>Frequency</b>                  | Weekly                                                                                                                                                                                                                                                              |
| <b>Aggregation level</b>          | Aggregated                                                                                                                                                                                                                                                          |
| <b>Population covered</b>         | 0-1%                                                                                                                                                                                                                                                                |
| <b>Year introduced</b>            | 2000                                                                                                                                                                                                                                                                |
| <b>Eligible for sampling</b>      | No                                                                                                                                                                                                                                                                  |
| <b>Sampling algorithm for RSV</b> | A random sample of including young children (<5 years) presenting with acute bronchitis/bronchiolitis (up to a maximum of 5 per week).                                                                                                                              |
| <b>Information available</b>      | Unique patient identifier; Age or date of birth; Sex; Geographical information; Date of clinical onset; Date of sampling; Date of diagnosis; Date of notification to surveillance organisation; Source of notification; Clinical symptoms; Other pathogens detected |
| <b>Denominator known</b>          |                                                                                                                                                                                                                                                                     |

| <b>Non-sentinel</b>                                                                                                                                                                    |
|----------------------------------------------------------------------------------------------------------------------------------------------------------------------------------------|
| Lab and Hospitals (all hospital testing)                                                                                                                                               |
| Part of other surveillance                                                                                                                                                             |
| All year round                                                                                                                                                                         |
| Weekly                                                                                                                                                                                 |
| Aggregated                                                                                                                                                                             |
|                                                                                                                                                                                        |
| 2007                                                                                                                                                                                   |
| No                                                                                                                                                                                     |
|                                                                                                                                                                                        |
| Age or date of birth; Sex; Geographical information; Date of sampling; Date of diagnosis; Date of notification to surveillance organisation; Source of notification; Clinical symptoms |
| No                                                                                                                                                                                     |
